# Supplementary material
Source: publisher site journal article supplement (https://www.dovepress.com/get_supplementary_file.php?f=392908.docx)
Supplement: Supplementary file 1 [file get_supplementary_file.php]

**Table S1.** Section distribution of 204 strains of *S. aureus*

| **Department** | **No. of MSSA(%)** | **No. of MRSA(%)** | **No. of hVISA** | | **No. of VSSA(%)** |
| --- | --- | --- | --- | --- | --- |
| **No. of MRSA(%)** | **No. of MSSA(%)** |  |
| Thy | 21 (12.7) | 3 (7.7) | 0 | 0 | 24 (13.2) |
| P | 11 (6.7) | 11 (28.3) | 5 (55.6) | 3 (23.1) | 14 (7.7) |
| De | 18 (10.9) | 0 | 0 | 2 (15.4) | 16 (8.8) |
| Hand | 15 (9.1) | 2 (5.1) | 0 | 0 | 17 (9.3) |
| Deve | 11 (6.7) | 4 (10.3) | 1 (11.1) | 1 (7.7) | 13 (7.1) |
| PS | 10 (6.1) | 3 (7.7) | 0 | 0 | 13 (7.1) |
| Ns | 10 (6.1) | 2 (5.1) | 0 | 1 (7.7) | 11 (6.0) |
| Ec | 11 (6.7) | 0 | 0 | 1 (7.7) | 10 (5.5) |
| Fa | 8 (4.8) | 3 (7.7) | 0 | 1 (7.7) | 10 (5.5) |
| Tra | 8 (4.8) | 2 (5.1) | 0 | 1 (7.7) | 9 (4.9) |
| ICU | 7 (4.2) | 1 (2.6) | 0 | 1 (7.7) | 7 (3.8) |
| ReCC | 4 (2.4) | 2 (5.1) | 0 | 1 (7.7) | 5 (2.7) |
| fB | 6 (3.6) | 0 | 0 | 0 | 6 (3.3) |
| Onc | 4 (2.4) | 2 (5.1) | 1 (11.1) | 0 | 5 (2.7) |
| BS | 4 (2.4) | 0 | 0 | 1 (7.7) | 3 (1.6) |
| Eye | 3 (1.8) | 0 | 0 | 0 | 3 (1.6) |
| CS | 1 (0.6) | 2 (5.1) | 1 (11.1) | 0 | 2 (1.1) |
| BJ | 2 (1.2) | 0 | 0 | 0 | 2 (1.1) |
| Neu | 2 (1.2) | 0 | 0 | 0 | 2 (1.1) |
| Hem | 2 (1.2) | 0 | 0 | 0 | 2 (1.1) |
| Nep | 2 (1.2) | 0 | 0 | 0 | 2 (1.1) |
| OM | 2 (1.2) | 0 | 0 | 0 | 2 (1.1) |
| Ger | 1 (0.6) | 1 (2.6) | 0 | 0 | 2 (1.1) |
| ID | 1 (0.6) | 1 (2.6) | 1 (11.1) | 0 | 1 (0.5) |
| Reh | 1 (0.6) | 0 | 0 | 0 | 1 (0.5) |
| **TOTAL** | **165 (100%)** | **39 (100%)** | **9 (100%)** | **13 (100%)** | **182 (100%)** |

MRSA:Methicillin-resistant *S. aureus,* MSSA: Methicillin-susceptible *S. aureus,* hVISA: heterogeneous vancomycine-intermediate *S.aureus.* VSSA: vancomycine-susceptible *S.aureus.* Thy: thyroid surgery, P: pediatric department, De: dermatology, Hand: hand microsurgery, Deve: dermatology and venereology, PS: pediatric surgery, Ns: neurosurgery, Ec: endocrinology department, Fa: foot and ankle surgery, Tra: department of traumatic Orthopaedics, ICU: Intensive care unit, Recc: Respiratory and critical care department, fB: Burn and Plastic Surgery Department, Onc: Oncology department, BS: Breast surgery, Eye: Eye clinic, CS: Cardiac surgery, BJ: Bone and joint surgery, Neu: Neurology, Hem: Department of Hematology, Nep: Nephrology, OM: Oral and Maxillofacial Surgery, Ger: Department of Geriatrics, ID: Department of infectious diseases, Reh: Rehabilitation Department

**Table S2.** Summary of results for CC/ST, SCC*mec*, *spa* and *agr* types of 204 bacterial strains

| group |  | CC/ST | *spa* | SCCmec | *agr* |
| --- | --- | --- | --- | --- | --- |
| MRSA  (39) |  | CC59/ST59 | a t437 (21), t172, t3736 (1) | Ⅳa | Ⅰ |
|  |  | t3527 (1) | Ⅲ | Ⅰ |
|  | CC59/ST7437 | a t437 (1) | Ⅳa | Ⅰ |
|  | CC5/ST965 | d t062 (1) | ⅣF | Ⅱ |
|  | ST9 | t899 (1) | NT | Ⅱ |
|  | ST22 | b t309 (2) | Ⅲ | Ⅰ |
|  | ST72 | t2431 (6), t20226 (2) | ⅣF | Ⅰ |
|  | ST1232 | c t034 (1) | Ⅴ | Ⅰ |
|  | ST7196 | t5155 (1) | ⅣF | Ⅰ |
| MSSA  (165) |  |  | b t309 (61), t078 (24), t571 (4), t701 (3), c t034, a t437, t081, t148, t163, t258, t287, t796, t1751 (2),  t091, t167, t280, t349, t377, t385, t441, t1350, t1451, t2257, t2883, t5335, t8099, t8100, t13300, t15234, t19224, t20227 (1) |  | Ⅰ |
|  |  |  |
|  |  |  |
|  |  |  |
|  |  |  |
|  |  |  |
|  |  |  |
|  |  | t002 (6), t084, t14014, d t062(2),  t085, t105, t954 (1) |  | Ⅱ |
|  |  |  |
|  |  |  |
|  |  |  |
|  |  | t127 (4), t1504, t20228 (1) |  | Ⅲ |
|  |  | t2092 (4), t1425, t2019 (3),  t159, t2086, t6832, t7320, t20229, t20230 (1) |  | Ⅳ |
|  |  |  |
|  |  |  |
| hVISA  (22) | MRSA | CC59/ST59 | e t437 (3) | Ⅳa | Ⅰ |
| CC5/ST965 | m t062 (1) | ⅣF | Ⅱ |
| ST72 | f t2431 (3), g t20226 (1) | ⅣF | Ⅰ |
| ST7196 | t5155 (1) | ⅣF | Ⅰ |
| MSSA | CC59/ST59 | h t1751 (1) |  | Ⅰ |
| CC5/ST5 | l t002 (2) |  | Ⅱ |
| CC5/ST965 | m t062 (1) |  | Ⅱ |
| CC5/ST7197 | l t002 (1) |  | Ⅱ |
| CC15/ST15 | n t084 (1) |  | Ⅱ |
| CC15/ST5459 | o t14014 (1) |  | Ⅱ |
| ST1 | p t127 (1) |  | Ⅲ |
| ST25 | i t078 (2), t167, j t287 (1) |  | Ⅰ |
| ST72 | k t148 (1) |  | Ⅰ |
| VSSA  (182) |  |  | t309(63), i t078 (22), e t437 (21), t571(4), f t2431, t034, t701(3), t081, t163, t258, t796(2),  k t148, j t287 , h t1751, g t20226, t091, t172, t280, t349, t377, t385, t441, t1350, t1451, t2257, t2883, t3527, t3736, t5335, t8099, t8100, t13300, t15234, t19224, t20227 (1) |  | Ⅰ |
|  |  |  |
|  |  |  |
|  |  |  |
|  |  |  |
|  |  |  |
|  |  |  |
|  |  |  |
|  |  | l t002 (3), m t062, n t084, o t14014, t899, t085, t105, t954 (1) |  | Ⅱ |
|  |  |  |
|  |  | p t127 (3), t1504, t20228 (1) |  | Ⅲ |
|  |  |  |
|  |  | t2092 (4), t1425, t2019 (3),  t159, t2086, t6832, t7320, t20229, t20230 (1) |  | Ⅳ |
|  |  |  |
|  |  |  |

a-d are the differential expression of t437, t309, t034 and t062 in MRSA and MSSA strains with *p*-values <0.001, <0.001, 0.473 and 0.473, respectively. e-p are the differential expression of t437, t2431, t20226, t1751, t078, t287, t148, t002, t062, t084, t14014 and t127 between hVISA (MRSA and MSSA) and VSSA strains with *p*-values of 1, 0.018, 0.205, 0.205, 0.951, 0.205, 0.205, 0.018, 0.031, 0.205, 0.205 and 0.369.
